# Supplementary material for: The Utility of Real-Time Remote Auscultation Using a Bluetooth-Connected Electronic Stethoscope: Open-Label Randomized Controlled Pilot Trial
Source: PubMed Central journal article supplement (PMC8367161; doi:10.2196/23109), 2021-07-27
Supplement: mhealth_v9i7e23109_app1.pdf [file mhealth_v9i7e23109_app1.pdf]

The questionnaires of the following study: The Utility of Real-Time Remote Lung auscultation Using a Bluetooth-Connected Electronic Stethoscope: Open-Label Randomized Controlled Trial

Data \_\_\_\_\_ Gender \_\_\_\_\_

Age \_\_\_\_\_ Years since graduation \_\_\_\_\_

Auscultation type: Classical auscultation / Remote auscultation

1.  Normal  Wheezes  Stridor  Rhonchi  
 Fine crackle  Coarse crackle  Pleural rubs
2.  Normal  Wheezes  Stridor  Rhonchi  
 Fine crackle  Coarse crackle  Pleural rubs
3.  Normal  Wheezes  Stridor  Rhonchi  
 Fine crackle  Coarse crackle  Pleural rubs
4.  Normal  Wheezes  Stridor  Rhonchi  
 Fine crackle  Coarse crackle  Pleural rubs
5.  Normal  Wheezes  Stridor  Rhonchi  
 Fine crackle  Coarse crackle  Pleural rubs
6.  Normal  Wheezes  Stridor  Rhonchi  
 Fine crackle  Coarse crackle  Pleural rubs
7.  Normal  Wheezes  Stridor  Rhonchi  
 Fine crackle  Coarse crackle  Pleural rubs
8.  Normal  Wheezes  Stridor  Rhonchi  
 Fine crackle  Coarse crackle  Pleural rubs
9.  Normal  Wheezes  Stridor  Rhonchi  
 Fine crackle  Coarse crackle  Pleural rubs
10.  Normal  Wheezes  Stridor  Rhonchi  
 Fine crackle  Coarse crackle  Pleural rubs

Memo
