# Supplementary material for: The Utility of Real-Time Remote Auscultation Using a Bluetooth-Connected Electronic Stethoscope: Open-Label Randomized Controlled Pilot Trial
Source: PubMed Central journal article supplement (PMC8367161; doi:10.2196/23109), 2021-07-27
Supplement: mhealth_v9i7e23109_app2.pdf [file mhealth_v9i7e23109_app2.pdf]

The questionnaires of the following study: The Utility of Real-Time Remote Cardiac auscultation Using a Bluetooth-Connected Electronic Stethoscope: Open-Label Randomized Controlled Trial

Data \_\_\_\_\_ Gender \_\_\_\_\_

Age \_\_\_\_\_ Years since graduation \_\_\_\_\_

Auscultation type: Classical auscultation / Remote auscultation

1.  Normal  S3  Aortic Stenosis (AS)  Aortic Regurgitation (AR)  
 Mitral Stenosis (MS)  Mitral Regurgitation (MR)  Atrial Fibrillation (Af)
2.  Normal  S3  Aortic Stenosis (AS)  Aortic Regurgitation (AR)  
 Mitral Stenosis (MS)  Mitral Regurgitation (MR)  Atrial Fibrillation (Af)
3.  Normal  S3  Aortic Stenosis (AS)  Aortic Regurgitation (AR)  
 Mitral Stenosis (MS)  Mitral Regurgitation (MR)  Atrial Fibrillation (Af)
4.  Normal  S3  Aortic Stenosis (AS)  Aortic Regurgitation (AR)  
 Mitral Stenosis (MS)  Mitral Regurgitation (MR)  Atrial Fibrillation (Af)
5.  Normal  S3  Aortic Stenosis (AS)  Aortic Regurgitation (AR)  
 Mitral Stenosis (MS)  Mitral Regurgitation (MR)  Atrial Fibrillation (Af)
6.  Normal  S3  Aortic Stenosis (AS)  Aortic Regurgitation (AR)  
 Mitral Stenosis (MS)  Mitral Regurgitation (MR)  Atrial Fibrillation (Af)
7.  Normal  S3  Aortic Stenosis (AS)  Aortic Regurgitation (AR)  
 Mitral Stenosis (MS)  Mitral Regurgitation (MR)  Atrial Fibrillation (Af)
8.  Normal  S3  Aortic Stenosis (AS)  Aortic Regurgitation (AR)  
 Mitral Stenosis (MS)  Mitral Regurgitation (MR)  Atrial Fibrillation (Af)
9.  Normal  S3  Aortic Stenosis (AS)  Aortic Regurgitation (AR)  
 Mitral Stenosis (MS)  Mitral Regurgitation (MR)  Atrial Fibrillation (Af)
10.  Normal  S3  Aortic Stenosis (AS)  Aortic Regurgitation (AR)  
 Mitral Stenosis (MS)  Mitral Regurgitation (MR)  Atrial Fibrillation (Af)
